# Supplementary material for: Pathogenic Huntingtin aggregates alter actin organization and cellular stiffness resulting in stalled clathrin-mediated endocytosis
Source: eLife. 2024 Oct 9;13:e98363. doi: 10.7554/eLife.98363 (PMC11643626; doi:10.7554/eLife.98363)
Supplement: Source data 1. [file elife-98363-data1.xlsx]

## Sheet: Fig1D
WT	Htt Q138
658.86	1278.66
1321.13	529
1342.38	342
1327.8	347
1729.76	727.33
1219.95	597
1072.81	505.15
1558.16	389.55
947	505.25
1088.18	493.6
1046.56	723.37
1307.25	603.66
1709.91	613.88
1293	393.31
438.39	764.16
1972.66	417.47
1992.77	703.95
1519.38	325.65
2305.2	410.92
783.87	501.5
855.12	483.66
914.8	594.7

## Sheet: Fig2D
WT	HTT Q138
25	4
8	11
16	15
8	2
17	5
45	5
13	5
11	5
9	7
12	3

## Sheet: Fig2E
WT	Htt Q138
0.064	0.064
0.064	0.064
0.064	0.064
0.064	0.064
0.064	0.064
0.064	0.064
0.064	0.064
0.064	0.064
0.064	0.064
0.064	0.064
0.064	0.064
0.064	0.064
0.064	0.064
0.064	0.064
0.064	0.064
0.09	0.064
0.09	0.064
0.127	0.064
0.127	0.064
0.127	0.064
0.127	0.064
0.127	0.064
0.127	0.064
0.135	0.064
0.161	0.064
0.161	0.064
0.161	0.09
0.161	0.09
0.18	0.09
0.191	0.127
0.191	0.127
0.194	0.127
0.194	0.127
0.202	0.127
0.202	0.127
0.228	0.127
0.237	0.127
0.254	0.127
0.254	0.127
0.26	0.127
0.27	0.135
0.282	0.135
0.282	0.161
0.301	0.18
0.318	0.191
0.321	0.191
0.325	0.191
0.336	0.191
0.383	0.194
0.383	0.194
0.385	0.194
0.391	0.195
0.397	0.202
0.41	0.202
0.421	0.202
0.422	0.228
0.441	0.228
0.448	0.228
0.448	0.252
0.453	0.254
0.456	0.254
0.462	0.254
0.51	0.254
0.524	0.254
0.539	0.262
0.563	0.264
0.572	0.267
0.585	0.292
0.649	0.297
0.682	0.309
0.689	0.309
0.695	0.317
0.706	0.317
0.716	0.321
0.728	0.321
0.741	0.325
0.742	0.325
0.766	0.329
0.767	0.332
0.781	0.346
0.83	0.354
0.836	0.382
0.873	0.382
0.912	0.385
1.009	0.402
1.009	0.422
1.045	0.426
1.051	0.439
1.061	0.464
1.355	0.47
1.407	0.54
1.471	0.6
1.485	0.604
1.511	0.7
1.618	0.882
1.73	0.9
2.05	1.233
2.727

## Sheet: Fig2F,G
	Q15							Q138
Cell no.	Area in micron	Intensity					Area in micron	Intensity
1	3.316	2785.49					10.422	3192.41
2	4.358	2114.1					10.061	3396.4
3	1.706	1493.1					3.031	3530
4	2.558	3166.31					2.85	3225.16
5	2.653	2379.66					8.338	3310.32
6	2.558	2065.07					8.717	3173.78
7	3.222	1350.5					4.548	1845.98
8	2.368	3141.04					11.275	2917.65
9	2.652	2626.87					7.29	3513.75
10	2.653	2673.8					12.411	3651.89

## Sheet: Fig2I
Q15	Q138
40.742	12.5
59.901	4.725
51.308	9.658
55.555	10.669
71.464	8.757
69.383	5.782
45.1	8.952
60.474	33.643
69.196	8.909
32.25	10.008

## Sheet: Fig3B
WT	Arp3 RNAi	Profilin RNAi
34	4	9
21	4	7
42	8	1
10	11	3
13	4	3
21	4	4
33	3	2
15	6	5
14	6	4
18	7	2

## Sheet: Fig4E
WT	HTT Q138	HTT Q138 + Arp3	HTT Q138 + Mrj
28	3	23	14
23	1	14	22
40	4	10	3
20	7	7	18
18	5	5	7
21	4	8	23
22	3	8	12
15	14	16	14
14	4	13	16
10	3	26

## Sheet: Fig5A
WT	WT + DMSO	WT + Lat A	HTT Q138	HTT Q138 + Lat A	HTT Q138 + Hip1	HTT Q138 + Mrj
405.117	589.725	165.352	799.043	299.574	301.187	325.616
642.576	207.95	196.306	659.834	210.841	250.475	286.595
524.225	197.121	68.804	489.758	247.404	245.934	193.805
150.563	535.719	244.717	1194.4	249.545	236.434	241.89
206.426	266.297	99.525	830.495	198.359	184.742	236.035
231.683		190.588	811.011	327.109	222.894	257.007
152.471		230.964	655.63	61.882	832.347
464.281		181.996	566.548	208.648	314.562
342.76		249.538	443.815	169.163
		114.618	675.43

## Sheet: Fig8A
WT	Aβ 42	FUS	Syn A30P	Syn A53T	TDP 43	HTT Q138
125.254	320.728	254.71	408.104	315.538	1133.61	655.63
184.657	334.797	269.402	227.634	196.345	1192.81	566.548
165.938	276.636	287.481	326.257	154.723	2026.32	443.815
209.712	277.081	220.058	277.443	175.652	574.118	675.43
221.98	231.488	168.371	231.909	233.265	1409.11	1149.06
157.369	231.497	184.91	271.696	278.146	588.656	731.732
	411.741	203.314	296.71	278.712	766.244
	193.607	180.479	189.682	341.732	1820.29
	197.915	164.006	513.236	213.055	1202.6
	210.421	192.759	170.441	186.843	1825.48
	198.381	151.329	183.21	280.993	1033.1
	221.996	133.279	227.759	150.39	501.267
	186.675	171.059	291.656	191.081	334.18
	266.771	109.328			312.597
	212.715				180.827
	264.166				199.695

## Sheet: Fig6D
WT	Aβ 42	FUS	HTT Q138	Syn A30P	Syn A53T	TDP 43
29.987	27.929	32.189	4.984	41.658	21.083	7.646
18.019	31.639	29.202	6.399	41.014	23.99	4.766
20.89	24.984	32.869	5.231	24.535	29.056	12.889
19.883	20.95	30.093	5.632	26.333	35.302	12.905
27.844	31.799	35.512	9.016	15.307	28.165	8.161
36.261	30.341	33.644	7.844	17.26	35.904	11.326
38.106	29.481	33.409	8.109	19.954	36.197	7.166
37.412	50.234	33.214	8.515	22.646	26.203	7.647
29.026	35.492	25.48	9.086	25.198	35.278	7.597
32.956	33.386	30.253	8.316	27.077	28.057	10.227
30.499	29.404	30.344	4.77	22.557	21.889	8.897
	30.968		7.369	16.471	27.077
					23.497

[truncated: 7 more sheets: Fig7B, Fig7C, Fig7D, Fig2_FigSupp1B, Fig3_FigSupp1C, Fig5_figSupp3, Fig6_figSupp1]
